# Supplementary material
Source: PubMed Central journal article supplement (PMC7868840)
Supplement: ajtr0013-0549-f9.pdf [file ajtr0013-0549-f9.pdf]

## Aging effects on auditory function

**Supplementary Table 1.** The one-way ANOVA analysis of the mean TEOAE amplitude between any two groups

| Comparison between groups | Left ear |          | Right ear |          |
|---------------------------|----------|----------|-----------|----------|
|                           | F        | P        | F         | P        |
| 1 vs 2                    | 4.09     | 0.045*   | 1.16      | 0.2833   |
| 1 vs 3                    | 6.05     | 0.0151*  | 1.34      | 0.2488   |
| 1 vs 4                    | 10.51    | 0.0015** | 8.91      | 0.0033** |
| 2 vs 3                    | 0.22     | 0.6411   | 0.01      | 0.9228   |
| 2 vs 4                    | 1.97     | 0.1625   | 4.23      | 0.0416*  |
| 3 vs 4                    | 0.93     | 0.3374   | 3.78      | 0.0537   |

1: 20-29 years group; 2: 30-39 years group; 3: 40-49 years group; 4: 50-59 years group (\*, P<0.05; \*\*, P<0.01).

**Supplementary Table 2.** The one-way ANOVA analysis of the mean TEOAE CS between any two groups

| Comparison between groups | Left ear |          | Right ear |         |
|---------------------------|----------|----------|-----------|---------|
|                           | F        | P        | F         | P       |
| 1 vs 2                    | 3.17     | 0.0773   | 2.23      | 0.1377  |
| 1 vs 3                    | 10.22    | 0.0017** | 0.85      | 0.3594  |
| 1 vs 4                    | 15.80    | 0.0001** | 4.46      | 0.0365* |
| 2 vs 3                    | 2.21     | 0.1392   | 0.32      | 0.5702  |
| 2 vs 4                    | 5.76     | 0.0177*  | 0.57      | 0.4528  |
| 3 vs 4                    | 1.01     | 0.3165   | 1.60      | 0.2073  |

1: 20-29 years group; 2: 30-39 years group; 3: 40-49 years group; 4: 50-59 years group (\*, P<0.05; \*\*, P<0.01).

**Supplementary Table 3.** The one-way ANOVA analysis of the mean EcochG AP amplitude between any two groups

| Comparison between groups | Left ear |          | Right ear |         |
|---------------------------|----------|----------|-----------|---------|
|                           | F        | P        | F         | P       |
| 1 vs 2                    | 6.60     | 0.0112*  | 0.36      | 0.5498  |
| 1 vs 3                    | 12.86    | 0.0005** | 2.42      | 0.1221  |
| 1 vs 4                    | 18.71    | <.0001** | 0.42      | 0.5160  |
| 2 vs 3                    | 1.12     | 0.2910   | 5.10      | 0.0255* |
| 2 vs 4                    | 3.85     | 0.0517   | 1.60      | 0.2084  |
| 3 vs 4                    | 0.92     | 0.3387   | 0.71      | 0.4021  |

1: 20-29 years group; 2: 30-39 years group; 3: 40-49 years group; 4: 50-59 years group (\*, P<0.05; \*\*, P<0.01).

## Aging effects on auditory function

**Supplementary Table 4.** The one-way ANOVA analysis of the mean EcochG AP latency between any two groups

| Comparison between groups | Left ear |          | Right ear |        |
|---------------------------|----------|----------|-----------|--------|
|                           | F        | P        | F         | P      |
| 1 vs 2                    | 0.06     | 0.8136   | 0.46      | 0.5001 |
| 1 vs 3                    | 1.05     | 0.3070   | 0.01      | 0.9105 |
| 1 vs 4                    | 9.84     | 0.0021** | 1.21      | 0.2731 |
| 2 vs 3                    | 0.67     | 0.4148   | 0.34      | 0.5579 |
| 2 vs 4                    | 9.03     | 0.0031** | 0.24      | 0.6256 |
| 3 vs 4                    | 4.94     | 0.0278*  | 1.06      | 0.3039 |

1: 20-29 years group; 2: 30-39 years group; 3: 40-49 years group; 4: 50-59 years group (\*, P<0.05; \*\*, P<0.01).

**Supplementary Table 5.** The one-way ANOVA analysis of the mean EcochG SP between any two groups

| Comparison between groups | Left ear |          | Right ear |         |
|---------------------------|----------|----------|-----------|---------|
|                           | F        | P        | F         | P       |
| 1 vs 2                    | 7.29     | 0.0078** | 0.00      | 0.9667  |
| 1 vs 3                    | 22.55    | <.0001** | 4.65      | 0.0328* |
| 1 vs 4                    | 25.91    | <.0001** | 1.00      | 0.3192  |
| 2 vs 3                    | 4.50     | 0.0357*  | 4.92      | 0.0281* |
| 2 vs 4                    | 6.86     | 0.0098** | 1.00      | 0.3179  |
| 3 vs 4                    | 0.39     | 0.5350   | 1.13      | 0.2893  |

1: 20-29 years group; 2: 30-39 years group; 3: 40-49 years group; 4: 50-59 years group (\*, P<0.05; \*\*, P<0.01).

**Supplementary Table 6.** The one-way ANOVA analysis of the mean EcochG SP/AP ratio between any two groups

| Comparison between groups | Left ear |        | Right ear |        |
|---------------------------|----------|--------|-----------|--------|
|                           | F        | P      | F         | P      |
| 1 vs 2                    | 0.00     | 0.9964 | 0.87      | 0.3521 |
| 1 vs 3                    | 3.42     | 0.0664 | 3.40      | 0.0672 |
| 1 vs 4                    | 0.00     | 0.9599 | 0.26      | 0.6081 |
| 2 vs 3                    | 3.59     | 0.0601 | 0.92      | 0.3378 |
| 2 vs 4                    | 0.00     | 0.9556 | 0.14      | 0.7093 |
| 3 vs 4                    | 3.34     | 0.0696 | 1.60      | 0.2080 |

1: 20-29 years group; 2: 30-39 years group; 3: 40-49 years group; 4: 50-59 years group.

## Aging effects on auditory function

**Supplementary Table 7.** The one-way ANOVA analysis of the mean MHINT SNR between any two groups

| Comparison between groups | Left ear |          | Right ear |          |
|---------------------------|----------|----------|-----------|----------|
|                           | F        | P        | F         | P        |
| 1 vs 2                    | 0.29     | 0.5896   | 0.28      | 0.5990   |
| 1 vs 3                    | 11.69    | 0.0008** | 19.04     | <.0001** |
| 1 vs 4                    | 54.54    | <.0001** | 61.86     | <.0001** |
| 2 vs 3                    | 16.72    | <.0001** | 15.97     | 0.0001** |
| 2 vs 4                    | 65.95    | <.0001** | 58.27     | <.0001** |
| 3 vs 4                    | 18.32    | <.0001** | 14.93     | 0.0002** |

1: 20-29 years group; 2: 30-39 years group; 3: 40-49 years group; 4: 50-59 years group (\*\*, P<0.01).

**Supplementary Table 8.** The one-way ANOVA analysis of the mean GDT between any two groups

| Comparison between groups | 1 kHz |          | 2 kHz |         | 4 kHz |          |
|---------------------------|-------|----------|-------|---------|-------|----------|
|                           | F     | P        | F     | P       | F     | P        |
| 1 vs 2                    | 0.29  | 0.5880   | 0.47  | 0.4947  | 0.21  | 0.6450   |
| 1 vs 3                    | 1.46  | 0.2286   | 0.03  | 0.8691  | 1.76  | 0.1866   |
| 1 vs 4                    | 6.72  | 0.0105*  | 2.80  | 0.0963  | 20.05 | <.0001** |
| 2 vs 3                    | 3.32  | 0.0706   | 0.29  | 0.5922  | 0.82  | 0.3675   |
| 2 vs 4                    | 10.27 | 0.0017** | 5.71  | 0.0182* | 17.59 | <.0001** |
| 3 vs 4                    | 2.28  | 0.1329   | 3.55  | 0.0617  | 11.16 | 0.0011** |

1: 20-29 years group; 2: 30-39 years group; 3: 40-49 years group; 4: 50-59 years group (\*, P<0.05; \*\*, P<0.01).
